RESEARCH ARTICLE

# Characterization of Xanthophyll Pigments, Photosynthetic Performance, Photon Energy Dissipation, Reactive Oxygen Species Generation and Carbon Isotope Discrimination during Artemisinin-Induced Stress in *Arabidopsis thaliana*

M. Iftikhar Hussain<sup>1,2\*</sup>, Manuel J. Reigosa<sup>1</sup>

**1** Department of Plant Biology and Soil Science, University of Vigo, Campus Lagoas-Marcosende, 36310—Vigo, Spain, **2** International Center for Biosaline Agriculture (ICBA), P.O. Box 14660, Dubai, U.A.E

\* [mih76@uvigo.es](mailto:mih76@uvigo.es)

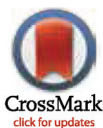

OPEN ACCESS

**Citation:** Hussain MI, Reigosa MJ (2015) Characterization of Xanthophyll Pigments, Photosynthetic Performance, Photon Energy Dissipation, Reactive Oxygen Species Generation and Carbon Isotope Discrimination during Artemisinin-Induced Stress in *Arabidopsis thaliana*. PLoS ONE 10(1): e0114826. doi:10.1371/journal.pone.0114826

**Academic Editor:** Raffaella Balestrini, Institute for Sustainable Plant Protection, C.N.R., ITALY

**Received:** June 28, 2014

**Accepted:** November 14, 2014

**Published:** January 30, 2015

**Copyright:** © 2015 Hussain, Reigosa. This is an open access article distributed under the terms of the [Creative Commons Attribution License](https://creativecommons.org/licenses/by/4.0/), which permits unrestricted use, distribution, and reproduction in any medium, provided the original author and source are credited.

**Data Availability Statement:** All data are available within the paper and its Supporting Information file.

**Funding:** The research was supported by project 10PXIB310261PR from the Galician Government and project AGL2010-17885 (subprograma AGR) "Estudio del modo de acción del citral en la respuesta temprana de plantas superiores" funded by Ministerio de Ciencia e Innovación. Subdirección General de Proyectos de Investigación Proyectos de Investigación Fundamental no orientada. The funders

## Abstract

Artemisinin, a potent antimalarial drug, is phytotoxic to many crops and weeds. The effects of artemisinin on stress markers, including fluorescence parameters, photosystem II photochemistry, photon energy dissipation, lipid peroxidation, reactive oxygen species generation and carbon isotope discrimination in *Arabidopsis thaliana* were studied. *Arabidopsis* ecotype Columbia (Col-0) seedlings were grown in perlite and watered with 50% Hoagland nutrient solution. Adult plants of *Arabidopsis* were treated with artemisinin at 0, 40, 80, 160  $\mu\text{M}$  for one week. Artemisinin, in the range 40–160  $\mu\text{M}$ , decreased the fresh biomass, chl *a*, *b* and leaf mineral contents. Photosynthetic efficiency, yield and electron transport rate in *Arabidopsis* were also reduced following exposure to 80 and 160  $\mu\text{M}$  artemisinin. The  $\Phi_{\text{NPQ}}$  and NPQ were less than control. Artemisinin treatment caused an increase in root oxidizability and lipid peroxidation (MDA contents) of *Arabidopsis*. Calcium and nitrogen contents decreased after 80 and 160  $\mu\text{M}$  artemisinin treatment compared to control.  $\delta^{13}\text{C}$  values were less negative following treatment with artemisinin as compared to the control. Artemisinin also decreased leaf protein contents in *Arabidopsis*. Taken together, these data suggest that artemisinin inhibits many physiological and biochemical processes in *Arabidopsis*.

## Introduction

The herbicidal control of weeds is a costly affair and deteriorates the quality of soil, water, animal and human health, and food [1]. This situation has stimulated the interest to identify alternative weed management strategies. Plant-derived secondary compounds have great potential in the development of environmentally safe herbicides with novel molecular sites of action [2].

had no role in study design, data collection and analysis, decision to publish, or preparation of the manuscript.

**Competing Interests:** The authors have declared that no competing interests exist.

Natural products are, in general, structurally more complex than synthetic herbicides and would not have been obtained by traditional synthetic approaches that tend to be limited by the cost of synthesizing the final molecule [3, 4].

Artemisinin is a sesquiterpene endoperoxide lactone that is produced in biseriolate glandular trichomes present on the leaves, stems and inflorescences of *Artemisia annua* [5,6]. It is derived from sesquiterpene precursor, farnesyl diphosphate, which itself is formed by the condensation of three isopentenyl diphosphate molecules synthesized either by mevalonic acid dependent or independent pathways present in the cytosol and plastid, respectively [7]. Artemisinin (1–5  $\mu\text{M}$ ) decreased the dry weight, frond production, chlorophyll contents, photosynthesis and respiration in *Lemna minor* [8]. It has shown to inhibit seedling growth in a number of mono and dicotyledonous plants [9]. It has also been reported as an allelopathic agent in many cases with high levels of phytotoxic activity [10–15]. Jessing et al. [16] found that  $\text{EC}_{50}$  values for the freshwater algae *Pseudokirchneriella subcapitata* and *L. minor* was 0.24 and 0.19 mg/L, respectively, with relative growth rate as an endpoint. Duke et al. [15] reported the selective phytotoxic properties of artemisinin because it inhibits the germination of lettuce (*Lactuca sativa* L.), but not that of redroot pigweed (*Amaranthus retroflexus* L.) and pitted glory (*Ipomoea lacunosa* L.).

Elucidating the structure and mode of actions of previously unknown natural phytotoxins could lead to new biorational approaches to weed control [17]. Several studies have set out to identify the molecular target sites of this secondary metabolite as well as its structural requirements for herbicidal activity [12, 15]. However, no definite target site has yet been identified. Inhibition of mitosis, abnormal mitotic configurations and mitotic stages suggest that artemisinin disrupts the formation of microtubule organizing centres including the loss of membrane integrity [18].

Allelopathy plays an important role in agroecosystems and offers the potential for selective biological weed management by the production and release of allelochemicals from leaves, flowers, seeds and roots of living or decomposing plant materials [19]. Artemisinin are present in various plant organs, including leaves, stems, floral and fruit parts [20]. However, there are large differences found in artemisinin content, depending on the variety, season, cultivation condition, and plant developmental stages [21, 22]. Previously, it was shown that artemisinin has potential to inhibit the seed germination of different plant species [13, 14, 15]; although no detailed research has been conducted regarding artemisinin impact on the growth of surrounding plants, or physiological and biochemical metabolism. Lydon et al. [14] found that the incorporation of *Artemisia annua* dried leaves in the soil provided good weed control, but the level of phytotoxic activity was independent of the concentrations of artemisinin in soil, suggesting that other factors may play important roles. Secondary plant metabolites play a variety of physiological roles and have a number of advantages over the synthetic herbicides as they usually have structural diversity and have novel target sites of action [23, 24]. Here, we report that artemisinin generates active oxygen species that interfere with physiological and biochemical processes in the model plant *Arabidopsis thaliana*.

## Materials and Methods

### 2.1. Plant material and growth conditions

The seeds of *Arabidopsis thaliana* L. (Heyn.) ecotype Columbia (Col-0) were surface sterilized for 3 min. in two consecutive aqueous solutions of EtOH (50%) and NaOCl (0.5%), both with Triton X-100 (0.01%), washed three times in autoclaved water; vernalized for 48 h at 4°C in 0.1% agar to favour synchronized germination, and transferred to Petri dishes containing agar with Murashige–Skoog nutrients (Sigma–Aldrich: St. Louis, USA) and sucrose at

concentrations of 1%. The Petri dishes were kept for 15 days under  $60 \mu\text{mol m}^{-2} \text{s}^{-1}$  of light in a growth chamber at  $22 \pm 2^\circ\text{C}$  and the plantlets were transferred to individual pots, 5 cm in diameter and 6 cm high, containing inert perlite, moistened with 50% Hoagland nutrient solution (pH 6.0). These pots were placed in a growth chamber with an 8-h photoperiod, at a temperature of  $22 \pm 2^\circ\text{C}$ , and a photosynthetic photon flux rate of  $120 \mu\text{mol m}^{-2} \text{s}^{-1}$  at canopy height. The plantlets were watered twice a week with 50% Hoagland nutrient solution containing ( $\text{KNO}_3$  (102 g/L),  $\text{Ca}(\text{NO}_3)_2$  (50 g/L),  $\text{MgSO}_4$  (49 g/L),  $(\text{NH}_4)_2 \text{HPO}_4$  (23 g/L), micronutrients:  $\text{H}_3\text{BO}_3$  (2.86 mg/L),  $\text{MnCl}_2$  (2.85 mg/L),  $\text{CuSO}_4$  (0.08 mg/L),  $\text{ZnSO}_4$  (0.4 mg/L),  $\text{H}_2\text{MoO}_4$  (0.02 mg/L),  $\text{FeSO}_4$  (2.8 g/L), Fe-ethylenediaminetetraacetic acid:  $\text{Na}_2\text{EDTA}$  (3.72 g/L) during the first two weeks and then watered every other day until the age of 5 weeks (three more weeks in pots).

## 2.2. Artemisinin solution preparation and experimental design

Stock solution of artemisinin was prepared by dissolving in acetone. The distilled water (distilled water + tween 20 (1L/0.1 mL) was added equal to the volume of acetone, and the solution was magnetically stirred and acetone was allowed to evaporate in a rotary evaporator (Rotavapor RE 12: BUCHI Switzerland). Distilled water + tween 20 (1L/0.1 mL) was added in this solution to make a stock solution of 100 mL volume. Distilled water + tween 20 were added to this stock solution to prepare treatments having concentrations of 40, 80 and 160  $\mu\text{M}$ . The procedure was repeated to prepare control without artemisinin. The pH of all these chemical solutions including control was adjusted to 6.0 with KOH. The experiment was initiated (day 0) when plants had an average of nine fully developed leaves (5 week-old). Plants were watered every other day (0, 2, 4, 6) with 15 mL of artemisinin (0, 40, 80 or 160  $\mu\text{M}$ ) (dissolved in 50% Hoagland nutrient solution) and physiological measurements were recorded. The plants were harvested and samples were collected for biochemical analysis. The experiment was arranged in Randomized Complete Block Design (RCBD) with four replications.

## 2.3. Chlorophyll fluorescence measurements

The fluorescence measurements were made (from day 0 up till day 7) by using a Maxi Imaging PAM Chlorophyll Fluorescence System by Walz (Effeltrich, Germany). At each measuring time, the plants were kept in darkness for 5 min to allow all reaction centres to open and minimize fluorescence associated with the energization of the thylakoid membrane, after which the whole plants were successively illuminated at an intensity of  $0.5 \mu\text{mol m}^{-2} \text{s}^{-1}$  for the measurement of  $F_0$  (the minimum fluorescence of dark-adapted leaves). The leaves were illuminated with a saturating pulse of intensity  $2700 \mu\text{mol m}^{-2} \text{s}^{-1}$  for measurement of  $F_m$  (maximum fluorescence of dark-adapted leaves) and calculation of  $F_v = F_m - F_0$  and  $F_v/F_m$  (maximum quantum efficiency of dark-adapted PSII) for 5 min, during which actinic illumination at  $110 \mu\text{mol m}^{-2} \text{s}^{-1}$  were interrupted every 20 s with 800 ms saturating pulses of  $2700 \mu\text{mol m}^{-2} \text{s}^{-1}$  for measurement of  $\Phi_{II}$  (effective photochemical quantum yield, or operating efficiency, at PSII),  $\Phi_{NPQ}$  (quantum yield of regulated non-fluorescent non-photochemical de-excitation),  $\Phi_{NO}$  (quantum yield of all fluxes other than  $\Phi_{NPQ}$  and  $\Phi_{II}$ , including fluorescence),  $q_N$  (non-photochemical quenching coefficient, i.e. the fraction of dark-adapted variable fluorescence that is lost upon adaptation to light);  $q_P$  (photochemical quenching coefficient);  $q_L$  (fraction of PSII centres that are open),  $F'_v/F'_m$  (maximum efficiency of PSII after adaptation to light) and ETR (apparent electron transport rate). All parameters were calculated as defined previously [25, 26]. Fifteen measurements were obtained for each parameter, which yielded a kinetic plot for each parameter. The integral values of the area were obtained for all of these graphs. The value represented in the graphs of fluorescence is the average area that was calculated from kinetic measurement for four replicates in

each treatment. This area highlights the magnitude of change and could be used to observe the total value of the trend.

## 2.4. Chlorophyll *a*, and *b* contents

For each replicate, fresh leaves (100 mg) were homogenized in 1.5 mL of methanol and mixture was centrifuged at  $170 \times g$  for 5 min. A 500  $\mu\text{L}$  sample of the supernatant was mixed with 500  $\mu\text{L}$  of methanol and absorbance was measured on Shimadzu UV-260 Spectrophotometer at 470, 653, 666, 750 nm. Four replications were measured from each treatment. The amount of the pigments was calculated according to the simultaneous equations of Wellburn [27] as follows:

$$\text{Chla} = (15.65A_{666} - A_{750}) - 7.34A_{663} - A_{750} \cdot V \quad \text{Eqn1}$$

$$\text{Chlb} = (27.07(A_{663} - A_{750}) - 11.21(A_{666} - A_{750})) \cdot V \quad \text{Eqn2}$$

## 2.5. *A. thaliana* biomass determination and elemental analysis

At harvest, the C, H, and N contents of dried leaf (3 mg) were determined in a Fisons Instruments EA1108 apparatus with a detection limit of 10 ppm. The dry leaf (50 mg) was used to measure  $\text{Ca}^{2+}$ ,  $\text{Mg}^{2+}$ ,  $\text{Cu}^{2+}$ ,  $\text{Zn}^{2+}$ ,  $\text{Al}^{3+}$ ,  $\text{Fe}^{2+}$ ,  $\text{Na}^+$ ,  $\text{K}^+$  and  $\text{PO}_4^-$  contents by inductively coupled plasma optical emission spectrometry in a Perkin Elmer Optima 4300DV.

## 2.6. Carbon isotope composition analysis

Collected plant leaf samples were immediately dried in a forced-air oven at  $70^\circ\text{C}$  (Gallenkamp oven, Loughborough, Leicestershire, UK) to constant weight and ground in Ball Mills (Retsch MM 2000, Haan, Germany). Dry ground plant material were weighed (1700–2100  $\mu\text{g}$ ) with weighing meter (Metler Toledo GmbH: Greifensee Switzerland) and filled in tin capsules (5x3.5 mm, Elemental Microanalysis Limited, U.K.). Each tin capsule was inserted automatically into a combustion oven at  $1600\text{--}1800^\circ\text{C}$  in the presence of oxygen and converted to  $\text{CO}_2$  and  $\text{N}_2$ . Subsequently, isotope ratios were determined in an Isotopic Ratio Mass Spectrometer (Finnegan: Thermo Fisher Scientific, model MAT-253, Swerte Germany) coupled with an Elemental Analyzer (Flash EA-1112, Swerte Germany). The Isotopic ratio mass spectrometer has an analytical precision better than 0.3‰ for  $^{13}\text{C}$ . All preparations of isotopic analysis were performed at CACATI (Centro de Apoio Cientifico Tecnologico a la Investigacion), University of Vigo, Spain.

Carbon Isotope composition ratios are expressed in ‰ as  $\delta$  values where;

$$\delta(\text{‰}) = ((R_{\text{sample}}/R_{\text{standard}}) - 1) \times 1000 \quad \text{Eqn3}$$

Where  $R_{\text{sample}}$  is the ratio of  $^{13}\text{C}/^{12}\text{C}$  and  $R_{\text{standard}}$  are standards used. Vienna PeeDee Belmnite (VPDB) was used as standard for the carbon. The accuracy and reproducibility of the measurements of  $\delta^{13}\text{C}$  were checked with an internal reference material (NBS 18 and IAEA-C6 for C).

Carbon isotope discrimination is a measure of the carbon isotopic composition in plant material relative to the value of the same ratio in the air on which plant feed:

$$\Delta(\text{‰}) = ((\delta_a - \delta_p)/(1 + \delta_p)) \times 1000 \quad \text{Eqn4}$$

where  $\Delta$  represents carbon isotope discrimination,  $\delta_a$  represents C isotope composition in the source air, and  $\delta_p$  represents C isotope composition in the plant tissue. The theory

published by Farquhar et al. [28] and Farquhar & Richards [29] indicates that carbon discrimination in leaves of plants can be expressed in relationship to CO<sub>2</sub> concentrations inside and outside of leaves in its simplest form as:

$$\begin{aligned} \Delta &= a + (b - a)ci/ca \\ \Delta &= 4.4 + (27 - 4.4)ci/ca \end{aligned} \tag{Eqn5}$$

where *a* is discrimination that occurs during diffusion of CO<sub>2</sub> through the stomata (4.4‰), *b* is discrimination by Rubisco (27‰), and *ci/ca* is the ratio of the leaf intercellular CO<sub>2</sub> concentrations to that in the atmosphere. Equation (3) shows a direct and linear relationship between  $\Delta$  and *ci/ca*. Therefore, measurement of  $\Delta$  will provide an estimation of the assimilation-rate-weighted value of *ci/ca*. Data of  $\delta^{13}C_{air}$ , *ci* and *ca* were obtained from McCarroll & Loader [30] who used the high precision records of atmospheric  $\Delta^{13}C$  from Antarctic ice cores, and the atmospheric CO<sub>2</sub> concentrations (ppm) from Robertson et al. [31].

## 2.7. Root oxidizability

Root oxidizability is an indirect estimation of tissue viability, and is determined using 2,3,5-triphenyl tetrazolium chloride (TTC) [32]. Viable (i.e., respiring) tissue reduces TTC to red coloured triphenyl formazan by accepting electrons from mitochondrial electron transport chain. Thus, any decrease in root oxidizability refers to reduced respiration resulting from tissue damage and, therefore, reduced viability. Briefly, root tissue (50 mg) was treated with 5 mL of 0.4% TTC solution (w/v) and 5 mL of 1/15 M potassium phosphate buffer (pH 7.4). The mixture was incubated at 40°C for 3 h followed by the addition of 2 mL 2.0 N H<sub>2</sub>SO<sub>4</sub>. Thereafter, the roots were ground in 10 mL of reagent grade ethyl acetate to extract red triphenyl formazan that was recorded at 485 nm and expressed as  $A_{485} g^{-1} h^{-1}$ .

## 2.8. Lipid peroxidation

At harvest, lipid peroxidation was determined by measurement of malonyldialdehyde (MDA) content [33]. Pre-frozen plant material (120 mg) were homogenized in 80% ethanol and centrifuged at 3000 × *g* for 10 min at 4°C, the supernatant was incubated at 95°C with 20% TCA containing 0.01% hydroxytoluenebutylate, with and without 0.5% thiobarbituric acid (TBA). Absorbance was measured at 440, 532 and 600 nm. The lipid peroxidation was calculated as the malonyldialdehyde (MDA) (nmol/mL) equivalents according to this equation;

$$MDA(nmol/mL) = ((A - B)/157) \times 10^3 \tag{Eqn6}$$

where  $A = (Abs_{532} - Abs_{600})_{TBA+} - (Abs_{532} - Abs_{600})_{TBA-}$   
and  $B = 0.0571 \times (Abs_{440} - Abs_{600})_{TBA+}$ .

## 2.9. Leaf protein content

After harvest total protein content was determined by Bradford's method [34]. For each replicate, fresh leaves (100 mg) were homogenized in 0.8 mL of 0.05 M Tris buffer (pH 7.4) containing 0.05 g of the antioxidant polyvinyl polypyrrolidone, and the mixture was centrifuged at 2860 *g* for 20 min at 4°C. A 0.1 mL sample of the supernatant was mixed with Bradford's reagent, and absorbance at 595 nm was measured and translated into protein content using a calibration curve constructed with bovine serum albumin as standard.

## 2.10. Statistical analysis

Following testing for non-normality by the Kolmogorov–Smirnov test and Levene’s testing for heteroscedasticity, the significance of differences among group means was estimated by analysis of variance followed by the Duncan test for homoscedastic data or by the Dunnett test for heteroscedastic data using SPSS 17.0 statistical package (SPSS, Chicago, IL, USA). Each value represents the mean ( $\pm$  S.E.) of four replicates.

## Results

Previously, we reported the weed suppressive potential of artemisinin on germination and seedling growth of *Arabidopsis thaliana* in a laboratory setting bioassay [35]. This experiment was undertaken to evaluate the physiological, biochemical and isotopic responses of *A. thaliana* under allelopathic stress of artemisinin.

### 3.1. Effect of artemisinin on leaf biomass of *A. thaliana*

Exposure of *Arabidopsis* to artemisinin caused a dose-dependent reduction in fresh weight (Table 1), although maximum decrease was observed at 160  $\mu$ M artemisinin. At 80  $\mu$ M, artemisinin, caused 52% reduction in fresh biomass while exposure of the *Arabidopsis* leaves to 160  $\mu$ M artemisinin exacerbated the phytotoxic effects and fresh biomass in these plants represented 59% less than the control plants (Table 1) and formation of necrosis on the outer surface of the leaf zone (personal observation). Artemisinin decreased the leaf dry mass at 160  $\mu$ M as compared to control. However, there were no differences in leaf dry weight between control and treated plants at all other concentrations. Furthermore, artemisinin reduced the leaf fresh/dry weight ratio at 80 and 160  $\mu$ M concentrations (Table 1). The leaf carbon (C) and nitrogen (N) contents in *Arabidopsis* decreased after treatment with 160  $\mu$ M artemisinin. Artemisinin (40, 80 and 160  $\mu$ M) increased the sodium, potassium, phosphorus and aluminium contents in *Arabidopsis* leaves, following 7 days exposure (Table 2). Simultaneous with the above changes in sodium, potassium and phosphorus, no reduction of hydrogen and copper contents in *Arabidopsis* leaves was observed following artemisinin treatment (Table 3).

### 3.2. Effect of artemisinin on chlorophyll pigments

Chlorophyll *a* and *b* contents decreased at 40, 80 and 160  $\mu$ M artemisinin. The chl *a* content decreased by approximately 40% compared to the control following exposure to 160  $\mu$ M artemisinin (Fig. 1A). The chl *b* contents in *Arabidopsis* leaves were reduced after treatment with

**Table 1. Effects of Artemisinin (0, 40, 80, 160  $\mu$ M) on leaf fresh and dry weight (g) and leaf fresh/dry weight ratio of *Arabidopsis thaliana*.**

| Artemisinin ( $\mu$ M concentrations) | Fresh weight (FW) (g) | Dry weight (DW) (g) | FW/DW Ratio       |
|---------------------------------------|-----------------------|---------------------|-------------------|
| 0 (Control)                           | 0.363 $\pm$ 0.05a     | 0.048 $\pm$ 0.01a   | 11.73 $\pm$ 3.83a |
| 40                                    | 0.310 $\pm$ 0.06a     | 0.042 $\pm$ 0.01a   | 10.77 $\pm$ 3.59a |
| 80                                    | 0.175 $\pm$ 0.03b     | 0.042 $\pm$ 0.007a  | 4.92 $\pm$ 1.58b  |
| 160                                   | 0.150 $\pm$ 0.007c    | 0.035 $\pm$ 0.009b  | 5.44 $\pm$ 1.48b  |

Means followed by different letters are significantly different at  $p < 0.005$ .

Kolmogorov–Smirnov testing for non-normality and Levene’s testing for heteroscedasticity. Statistical significance of differences among group means was estimated by analysis of variance followed by Duncan test for homoscedastic data and by the Dunnett test for heteroscedastic data. Each value represents the mean ( $\pm$  S.E.) of four replicates.

doi:10.1371/journal.pone.0114826.t001



**Table 2. Carbon (%) and nitrogen (%) and C/N ratio in leaves of thale cress (*Arabidopsis thaliana*) following 1 week exposure to artemisinin at 0, 40, 80, 160 μM concentrations.**

| Artemisinin (μM concentrations) | Carbon (%)  | Nitrogen (%) | C/N Ratio  |
|---------------------------------|-------------|--------------|------------|
| 0 (Control)                     | 34.55±0.19a | 7.32±0.09a   | 4.72±0.07a |
| 40                              | 34.05±0.41a | 7.48±0.10a   | 4.55±0.11a |
| 80                              | 33.72±0.65a | 7.38±0.19a   | 4.58±0.21a |
| 160                             | 28.84±0.28b | 6.29±0.10b   | 4.58±0.05a |

Means followed by different letters are significantly different at  $p < 0.005$ .

Kolmogorov–Smirnov testing for non-normality and Levene’s testing for heteroscedasticity the statistical significance of differences among group means was estimated by analysis of variance followed by Duncan test for homoscedastic data and by Dunnett test for heteroscedastic data. Each value represents the mean (± S.E.) of four replicates.

doi:10.1371/journal.pone.0114826.t002

80 and 160 μM artemisinin and the reduction was 20% and 15%, in terms of the control (Fig. 1B).

### 3.3. Artemisinin dosage-inhibiting curves of $F_v/F_m$ , $\Phi_{II}$ and ETR

Artemisinin treatments reduced the photosynthetic efficiency under the dark adapted state ( $F_v/F_m$ ) in *A. thaliana* up till day 7 at 40, 80 and 160 μM compared to the control (Fig. 2A). Artemisinin reduced the photosynthetic yield  $\Phi_{II}$  during all 7 days after artemisinin treatment at 40 μM, but it was on a par with control on day 2 and 3 while, once again, it decreased on day 4 till day 7 in terms of the control (Fig. 2B). Meanwhile, at 80 μM there was an uneven effect during the first 4 days, but however, during day 5,  $\Phi_{II}$  values decreased up to day 7, in terms of the control. The artemisinin at 40, 80 and 160 μM decreased the electron transport rate (ETR) during day 1, but however, it was on a par with control on day 2 and 3. From day 4 – 7 artemisinin decreased ETR values at all concentrations in terms of the control. Meanwhile, at 80 and 160 μM artemisinin, there was a strong inhibition of ETR values during day 6 and 7 in terms of the control (Fig. 2C).

### 3.4. Effect of artemisinin on $\Phi_{NPQ}$ , NPQ and $\Phi(NO)$

Excitation energy fluxes in these three different pathways could easily be assessed by imaging-PAM chlorophyll fluorometer. Three fluxes recorded every day of artemisinin application

**Table 3. Sodium (mg g<sup>-1</sup>), potassium (mg g<sup>-1</sup>), phosphate (mg g<sup>-1</sup>), hydrogen (mg g<sup>-1</sup>), aluminium (mg kg<sup>-1</sup>) and copper (mg kg<sup>-1</sup>) contents in leaves of thale cress following 1 week exposure to artemisinin at 0, 40, 80, 160 μM concentrations in leaves of *Arabidopsis thaliana*.**

| Artemisinin (μM concentrations) | Sodium (mg g <sup>-1</sup> ) | Potassium (mg g <sup>-1</sup> ) | Phosphate (mg g <sup>-1</sup> ) | Hydrogen (mg g <sup>-1</sup> ) | Aluminium (mg kg <sup>-1</sup> ) | Copper (mg kg <sup>-1</sup> ) |
|---------------------------------|------------------------------|---------------------------------|---------------------------------|--------------------------------|----------------------------------|-------------------------------|
| 0 (Control)                     | 8552.72± 45a                 | 56085.77±69a                    | 13499.95±579a                   | 5.25±0.05a                     | 272.14±24.92a                    | 9.19±0.12a                    |
| 40                              | 9519.27±59b                  | 62329.35±81b                    | 15220.34±614b                   | 5.08±0.06a                     | 359.51±90.96b                    | 9.26±0.79a                    |
| 80                              | 9100.78±10b                  | 60273.83±24b                    | 15144.49±429b                   | 5.15±0.06a                     | 565.61±176.88b                   | 9.06±0.36a                    |
| 160                             | 11061.27±68b                 | 65546.46±15b                    | 16858.75±340b                   | 5.03±0.02a                     | 401.99±72.74b                    | 9.33±0.23a                    |

Means followed by different letters are significantly different at  $p < 0.005$ .

Kolmogorov–Smirnov testing for non-normality and Levene’s testing for heteroscedasticity. Statistical significance of differences among group means was estimated by analysis of variance followed by Duncan test for homoscedastic data and by the Dunnett test for heteroscedastic data. Each value represents the mean (± S.E.) of four replicates.

doi:10.1371/journal.pone.0114826.t003

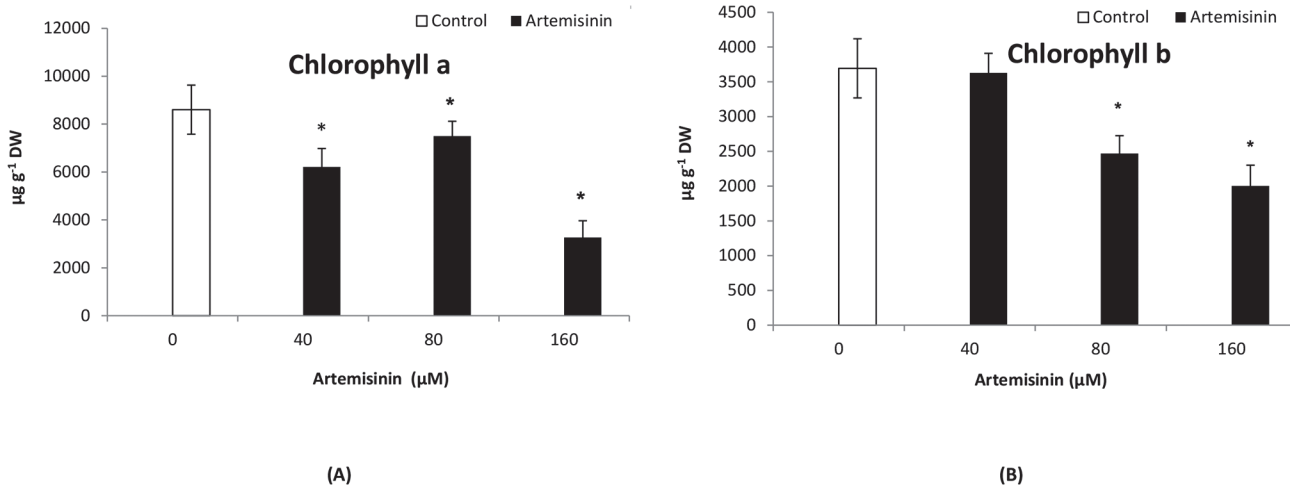

**Figure 1. Photosynthetic pigments, chlorophyll a (A) and b (B) in Arabidopsis leaves after treatment with 0, 40, 80, and 160 μM artemisinin and untreated control.** Whole plants were measured and the values integrated afterwards. Fifteen measures were obtained for each parameter at each measuring time, which gave a kinetic plot for each parameter along the time. The integral value of the area was obtained for each parameter at every time. \*Asterisks show the statistical significance as compared to control at  $p < 0.005$ . After Kolmogorov–Smirnov testing for non-normality and Levene’s testing for heteroscedasticity, the statistical significance of differences among group means was estimated by analysis of variance followed by Duncan test for homoscedastic data and by Dunnett test for heteroscedastic data.

doi:10.1371/journal.pone.0114826.g001

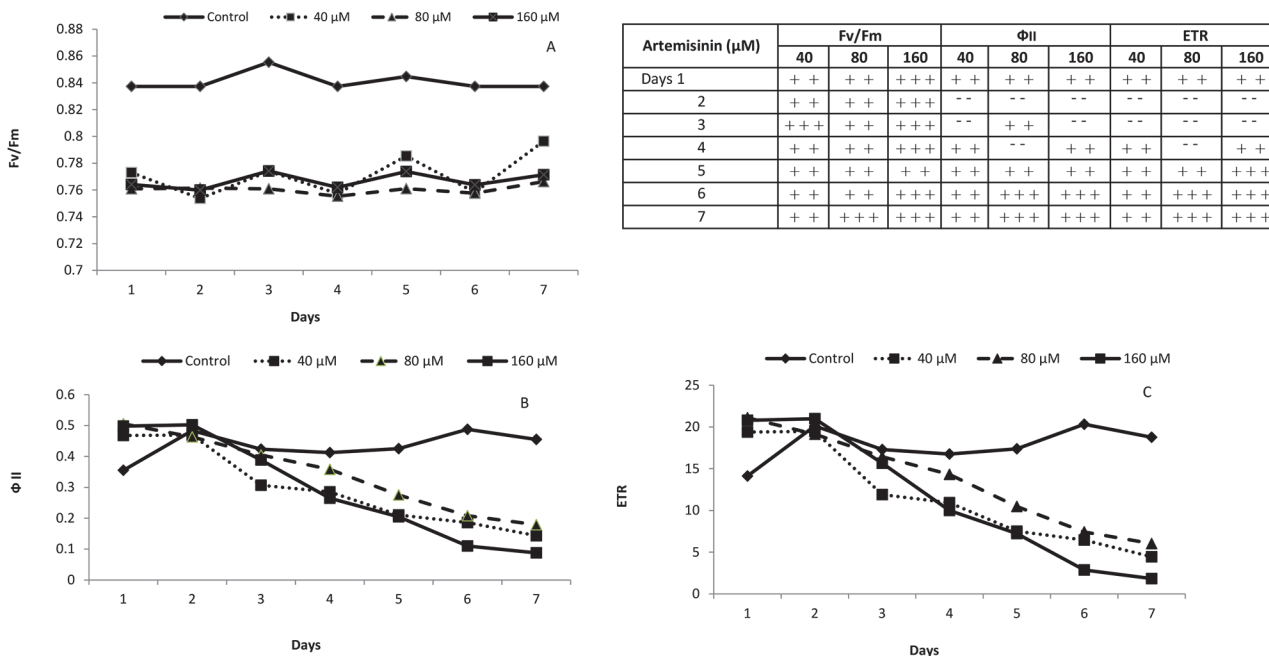

**Figure 2. Values of maximum photosynthetic efficiency of dark-adapted PSII ( $F_v/F_m$ ) (A), maximum photosynthetic yield ( $\Phi II$ ) (B) and apparent electron transport rate (ETR) (C) in whole Arabidopsis plants after treatment with 0, 40, 80 and 160 μM artemisinin.** Whole plants were measured and the values integrated afterwards. Fifteen measures were obtained for each parameter at each measuring time, which gave a kinetic plot for each parameter along the time. The integral value of the area was obtained for each parameter at every time. The table shows the statistical significance of positive (+) or negative (-) differences with respect to untreated plants. Plus signs indicate positive differences with respect to controls and minus signs negative differences. The number of plus or minus signs indicates statistical significance: one,  $p < 0.05$ ; two,  $p < 0.01$ ; three,  $p < 0.001$ . After Kolmogorov–Smirnov testing for non-normality and Levene’s testing for heteroscedasticity, the statistical significance of differences among group means was estimated by analysis of variance followed by Duncan test for homoscedastic data and by Dunnett test for heteroscedastic data.

doi:10.1371/journal.pone.0114826.g002



confirmed the differential artemisinin inhibitory impact on Arabidopsis. Artemisinin at all concentrations (40, 80, 160  $\mu\text{M}$ ) decreased values of  $\Phi_{\text{NPQ}}$ , NPQ and but  $\Phi$  (NO), in Arabidopsis was only less than control following treatment at 40 and 160  $\mu\text{M}$  artemisinin from day 1 – 3 (Fig. 3 A, B, C). The reduction of NPQ in Arabidopsis leaves was detected at all concentrations of artemisinin from day 4 to day 7 (Fig. 3B), whereas  $\Phi_{\text{NPQ}}$  were decreased following treatment with 40, 80, 160  $\mu\text{M}$  artemisinin from day 4 up till day 7 (Fig. 3A). The data exhibited typical saturation kinetics and also revealed inter-specific differences in heat energy dissipation in *A. thaliana* during exposure to increased artemisinin levels. However, the inhibition of NPQ became more serious in *A. thaliana* after treatment at 40, 80 and 160  $\mu\text{M}$  during the last 5 days. At the same time, inhibition of  $\Phi_{\text{NPQ}}$  was detected in Arabidopsis following treatment at all artemisinin concentrations. However, there was a tendency towards stimulation in  $\Phi$  (NO) in *A. thaliana* from day 4 to 7 (Fig. 3C). The above results showed that the excitation energy fluxes of NPQ and  $\Phi_{\text{NPQ}}$  can be used as the biomarkers for rapid phytotoxicity assessment.

### 3.5. Artemisinin dosage-inhibiting effect on $q_N$ , $q_P$ and $q_L$

Artemisinin at 40, 80 and 160  $\mu\text{M}$  declined  $q_N$  in Arabidopsis during all 7 days (Fig. 4A). The values of  $q_P$  decreased following treatment with artemisinin from day 3 to 7 than control at all concentrations. There was a stronger inhibition in values of  $q_P$  during last three days and 50% reduced in terms of control after artemisinin exposure at 160  $\mu\text{M}$  (Fig. 4B). The artemisinin reduced the  $q_L$  (the fraction of PSII centres that are open) from day 3 to day 7 following exposure to artemisinin at 40, 80, 160  $\mu\text{M}$ . However, there was no significant effect on  $q_L$  during the first

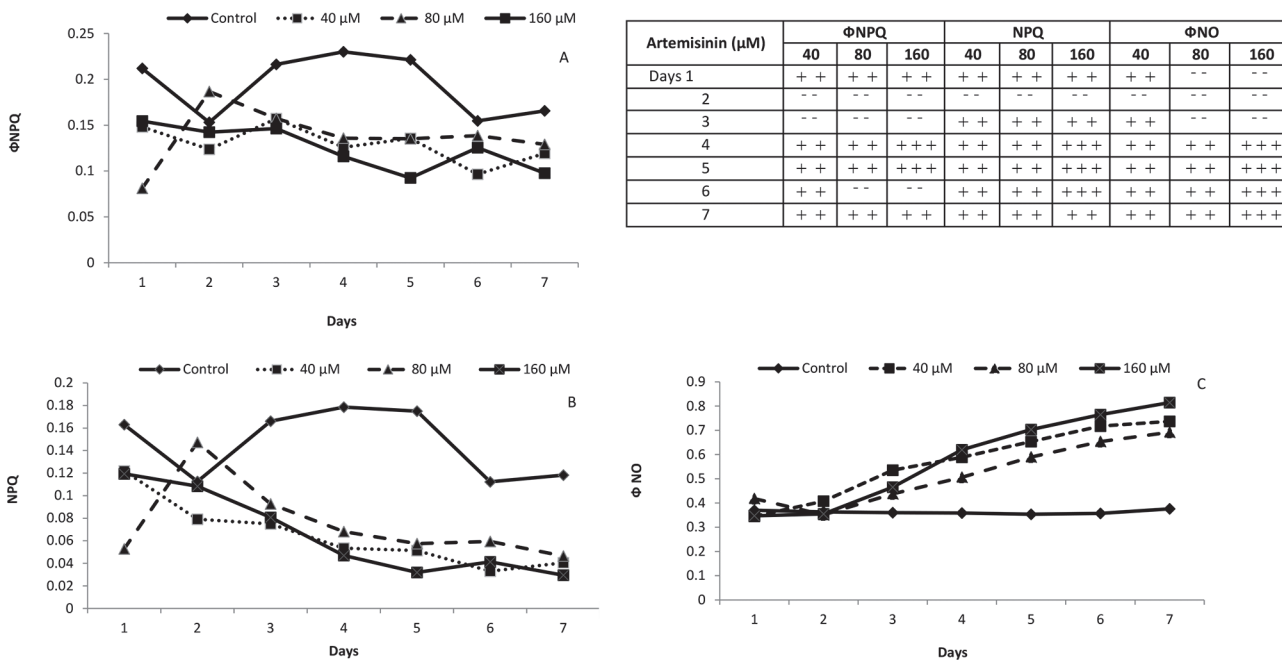

**Figure 3. Values of the quantum yield of light-induced non-photochemical quenching (NPQ) quantum yield of all photosynthetically active photon fluxes other than  $\Phi_{\text{NPQ}}$ , NPQ and  $\Phi_{\text{NO}}$  in whole Arabidopsis plants after treatment with 0, 40, 80 and 160  $\mu\text{M}$  artemisinin.** Whole plants were measured and the values integrated afterwards. Fifteen measures were obtained for each parameter at each measuring time, which gave a kinetic plot for each parameter along the time. The integral value of the area was obtained for each parameter at every time. Table shows the statistical significance of positive (+) or negative (-) differences with respect to untreated plants. Plus signs indicate positive differences with respect to controls and minus signs negative differences. The number of plus or minus signs indicates statistical significance: one,  $p < 0.05$ ; two,  $p < 0.01$ ; three,  $p < 0.001$ . After Kolmogorov–Smirnov testing for non-normality and Levene’s testing for heteroscedasticity, the statistical significance of differences among group means was estimated by analysis of variance followed by Duncan test for homoscedastic data and by Dunnett test for heteroscedastic data.

doi:10.1371/journal.pone.0114826.g003

two days at all artemisinin concentrations in terms of the control (Fig. 4). From day 4 to 7, there was severe damage to non-photochemical quenching coefficient ( $q_L$ ) at all concentrations tested (Fig. 4C). The changes of artemisinin dosage-inhibiting effect on  $q_P$ ,  $q_N$  and  $q_L$  in Arabidopsis showed a different trend i.e., there was a tendency to increase in values of  $q_N$  and  $q_L$  during the initial two days following artemisinin treatment.

### 3.6. Effects of artemisinin on root oxidizability and MDA content

The root oxidizability was measured in terms of triphenyltetrazolium chloride in Arabidopsis roots. Artemisinin stress caused an increase in root oxidizability (RO) in Arabidopsis at highest concentrations. Increasing the artemisinin concentrations in treated pots caused a gradual increase in the RO in Arabidopsis roots (Fig. 5 A). At 160  $\mu\text{M}$  artemisinin, the tendency was to increase RO, which was highest in terms of the control.

There was a concentration dependent increase in lipid peroxidation following artemisinin exposure (Fig. 5 B). After exposure to 40 and 80  $\mu\text{M}$  artemisinin, the level of MDA increased corresponding to 1.85 and 1.56 times higher than control, respectively. At 160  $\mu\text{M}$  artemisinin, MDA content increased by 31% over the control (Fig. 5 B). Increased RO along with increased MDA content indicated the occurrence of artemisinin-induced stress in Arabidopsis.

### 3.7. Effects of artemisinin on Arabidopsis leaf nutrient content

A reduction in  $\text{Mg}^{2+}$  content was observed in Arabidopsis leaves after treatment with 80 and 160  $\mu\text{M}$  artemisinin (Fig. 6), while  $\text{Mg}^{2+}$  content remained unaltered at lower concentrations (40  $\mu\text{M}$ ). In Arabidopsis,  $\text{Fe}^{2+}$  contents decreased drastically following exposure to artemisinin at 40 and 80  $\mu\text{M}$  concentrations while maximum reduction was noted at highest concentrations (160  $\mu\text{M}$ ) (Fig. 6). The  $\text{Ca}^{2+}$  content in Arabidopsis leaves decreased following treatment at 40 and 80  $\mu\text{M}$  artemisinin concentrations (Fig. 7). There was a tendency of stimulation in  $\text{Zn}^{2+}$  content in Arabidopsis leaves after artemisinin treatment (160  $\mu\text{M}$ ).

### 3.8. Effect of artemisinin on Arabidopsis leaf protein contents

Artemisinin decreased leaf protein contents of *A. thaliana* at all concentrations. The highest reduction (38.%) in protein contents in Arabidopsis leaves was obtained following exposure to 160  $\mu\text{M}$  artemisinin as compared to the control (Fig. 8).

### 3.9. Effects of artemisinin on carbon isotope composition in Arabidopsis leaf

In this study, the carbon isotope composition ( $\delta^{13}\text{C}$ ) values in Arabidopsis leaves were less negative ( $-35.82$ ,  $-35.87$  and  $-35.28\text{‰}$ ) following treatment with 40, 80 and 160  $\mu\text{M}$  artemisinin, respectively, compared to the control ( $-36.88\text{‰}$ ) (Fig. 9). The carbon isotope discrimination ( $\Delta^{13}\text{C}$ ) values in leaves of *A. thaliana* were decreased (28.85, 28.90) after treatment at 40 and 80  $\mu\text{M}$  artemisinin concentrations as compared to control (29.99) and the maximum reduction in  $\Delta^{13}\text{C}$  values (28.28) was observed at 160  $\mu\text{M}$  artemisinin concentrations (Fig. 9). The  $\Delta^{13}\text{C}$  values indicate that limiting the diffusion of  $\text{CO}_2$  through the stomatal aperture can result in less negative  $\delta^{13}\text{C}$  values. At 40 and 80  $\mu\text{M}$  concentrations, the artemisinin decreased the ratio of intercellular  $\text{CO}_2$  from inside to outside environment ( $ci/ca$ ) while at 160  $\mu\text{M}$ , there was a maximum reduction in  $ci/ca$  ratio (1.057) as compared to control (1.132) (Fig. 10).

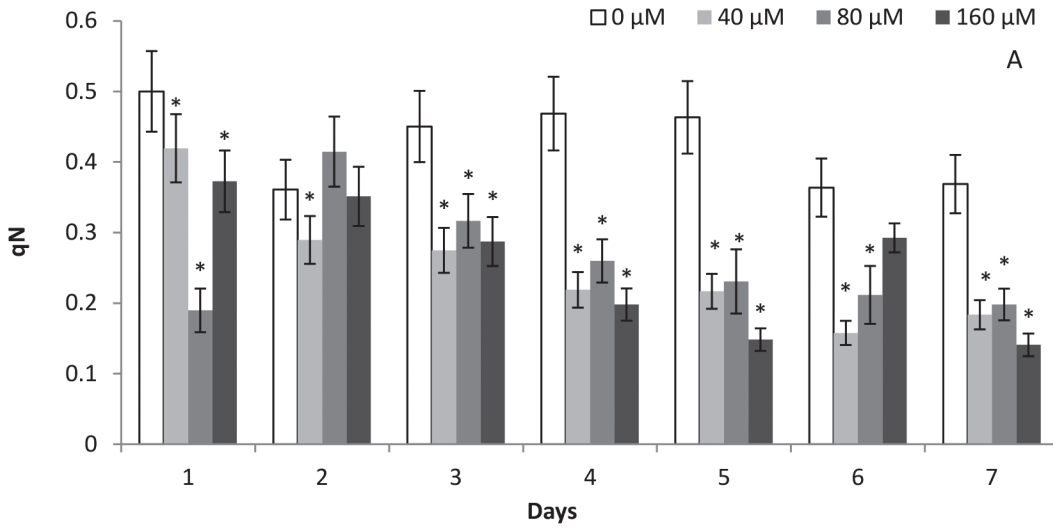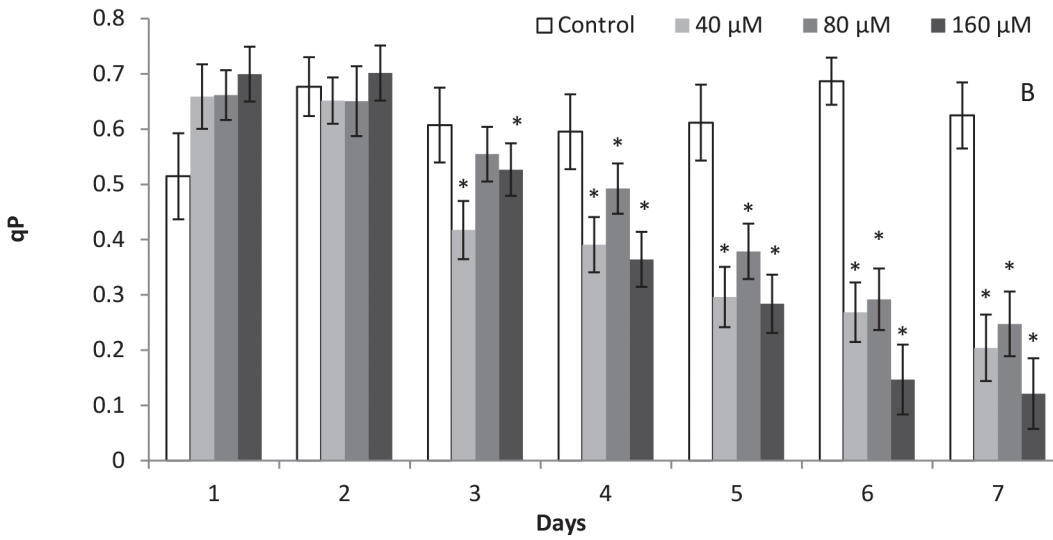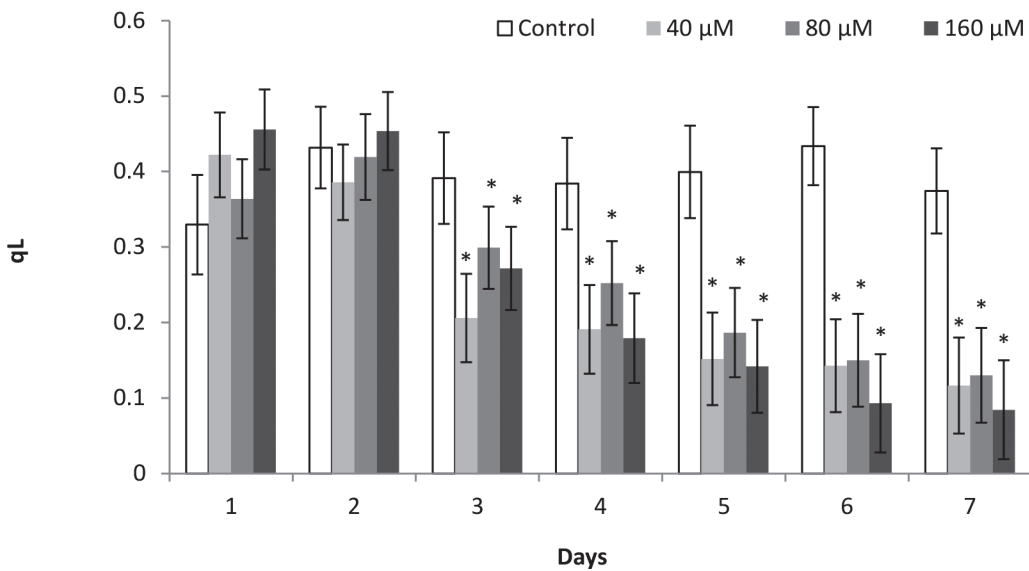

**Figure 4. Values of the chlorophyll fluorescence quenching coefficients (qP, qL, qN) in whole Arabidopsis plants after treatment with 0, 40, 80, 160 μM artemisinin.** Whole plants were measured and the values integrated afterwards. Fifteen measures were obtained for each parameter at each measuring time, which gave a kinetic plot for each parameter along the time. The integral value of the area was obtained for each parameter at every time. \*Asterisks show the statistical significance as compared to control at  $p < 0.005$ . After Kolmogorov–Smirnov testing for non-normality and Levene’s testing for heteroscedasticity, the statistical significance of differences among group means was estimated by analysis of variance followed by Duncan test for homoscedastic data and by Dunnett test for heteroscedastic data.

doi:10.1371/journal.pone.0114826.g004

## Discussion

Despite the pharmaceutical importance of plant-derived artemisinin, relatively little is known about the biochemical, physiological and isotopic responses to artemisinin in target plants. Here, we studied the fundamental biological processes by investigating the Arabidopsis plants’ dynamic response to phytochemical treatments, interference in growth, development and physio-biochemical characteristics. In accordance with DiTomaso & Duke [36] and Lommen et al. [37], we confirmed that artemisinin was able to decrease the fresh biomass in a dose-dependent fashion (Table 1). Chen and Polatnick [38] reported that the fresh weight of mung bean seedlings treated with artemisinin was 19–26% less as compared to control. In this experiment, the reduction in the carbon and nitrogen content of Arabidopsis leaf was observed after treatment with artemisinin at 160 μM concentration (Table 2). Lydon et al. [14] found that *Artemisia annua* leaf tissue incorporated into the soil decreased the soybean biomass in a pot culture experiment. In this study, artemisinin increased the sodium, potassium, phosphorus, aluminium and copper contents. Conversely, Sánchez-Moreiras et al. [39] found a reduction in leaf nutrient contents in Arabidopsis after treatment with BOA (2–3H-benzoxazolinone (BOA)).

In all photosynthetic organisms, chlorophyll plays a central role in the harvesting and photochemical transformation of light energy into chemical energy. The excitation energy absorbed by the light harvesting complex (LHC) can usually undergo three fates; it can drive photosynthesis (photochemistry), be dissipated as heat or as red fluorescence. These three processes occur alongside each other. Therefore, determining the yield of chlorophyll fluorescence will give information about changes in the efficiency of photochemistry and heat dissipation [40]. Leaf photosynthetic pigment contents are good indicators for stress detection and tolerance [41]. Chl *a* and *b* contents were decreased after artemisinin treatment (Fig. 1) and this is in accordance with a correspondence decrease in  $F_v/F_m$  ratio. The decrease of Chl *a* and *b*

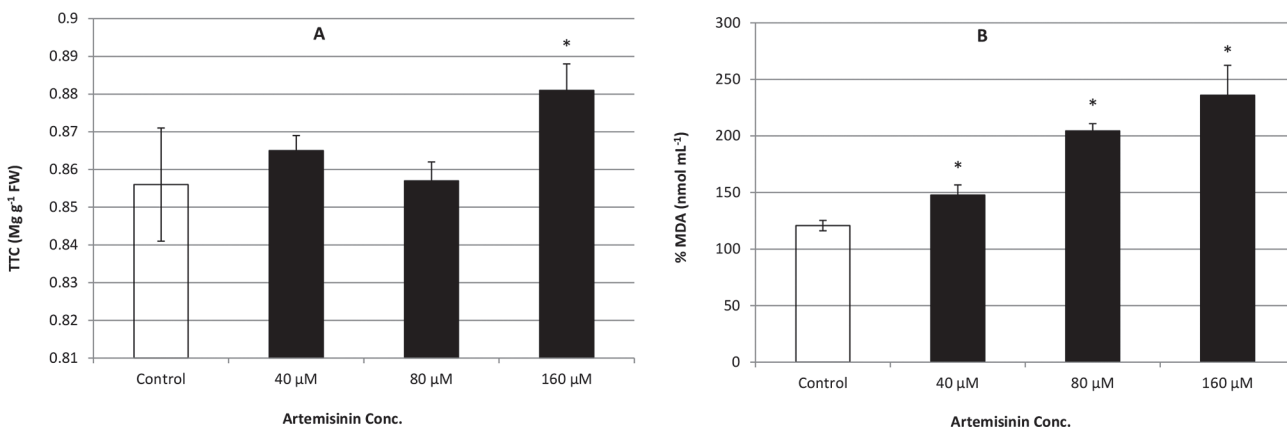

**Figure 5. Changes in leaf lipid peroxidation (% malondialdehyde content nmol/mL) and root oxidizability (TTC mg/g FW) in *A. thaliana* following treatment with artemisinin (0, 40, 80, 160 μM).** \*Asterisks show the significant difference at  $p < 0.005$ . Kolmogorov–Smirnov testing for non-normality and Levene’s testing for heteroscedasticity. The statistical significance of differences among group means was estimated by analysis of variance followed by Duncan test for homoscedastic data and by Dunnett test for heteroscedastic data. Each value represents the mean ( $\pm$  S.E.) of four replicates.

doi:10.1371/journal.pone.0114826.g005

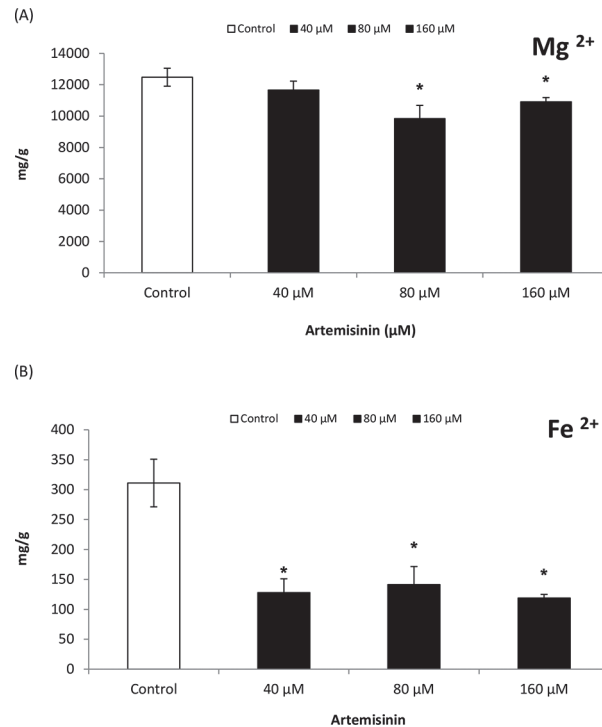

**Figure 6. Magnesium and iron contents (dry weight basis) of leaves of thale cress treated with different concentrations (0, 40, 80, and 160 μM) of artemisinin and in untreated control one week after treatment.** \*Asterisks show the statistical significance as compared to control at  $p < 0.005$ . After Kolmogorov–Smirnov testing for non-normality and Levene’s testing for heteroscedasticity, the statistical significance of differences among group means was estimated by analysis of variance followed by Duncan test for homoscedastic data, and by Dunnett test for heteroscedastic data. Each value represents the mean ( $\pm$  S.E.) of four replicates.

doi:10.1371/journal.pone.0114826.g006

contents in *Arabidopsis* indicate a preferential decrease in light-harvesting chlorophyll *a/b*-binding proteins associated with PSII (LHCII) to transfer excitation energy to the PSII core complex [42]. The decrease in LHCII due to reduction in the light absorption cross-section of the photosystem is an essential protection mechanism, which allows plants to survive in unfavourable conditions [43]. The artemisinin stress modifies the chlorophyll *a* content more than chlorophyll *b*, which appears to be less sensitive to artemisinin stress treatment.

Artemisinin treatments reduced photosynthetic efficiency under the dark adapted state ( $F_v/F_m$ ) in *A. thaliana* during all days. Other researchers also reported a variable decrease in photosynthesis, transpiration rate, stomatal conductance and water use efficiency in different plant species under allelochemical stress [44, 45]. The fall in  $F_v/F_m$  indicates a loss of photosynthetic capacity, possibly due to degradation of antenna pigments or proteins. Artemisinin reduced the photosynthetic yield  $\Phi_{II}$  during all 7 days. At 80 and 160 μM artemisinin, inhibited electron transport rate (ETR) in *Arabidopsis* from day 4 – 7 (Fig. 2). Bharati et al. [44] reported that artemisinin is converted, in vivo, to a derivative that inhibits photosynthetic electron transport. Allelochemicals appear to alter a variety of physiological processes including direct inhibition of PSII components and ion uptake, interruption of dark respiration and ATP synthesis, thylakoid electron transport (light reaction), and ROS-mediated allelopathic mechanisms [45].

To investigate the contribution of artemisinin towards the inhibition of non-photochemical fluorescence and heat energy dissipation; we describe here the phytotoxic impact of artemisinin

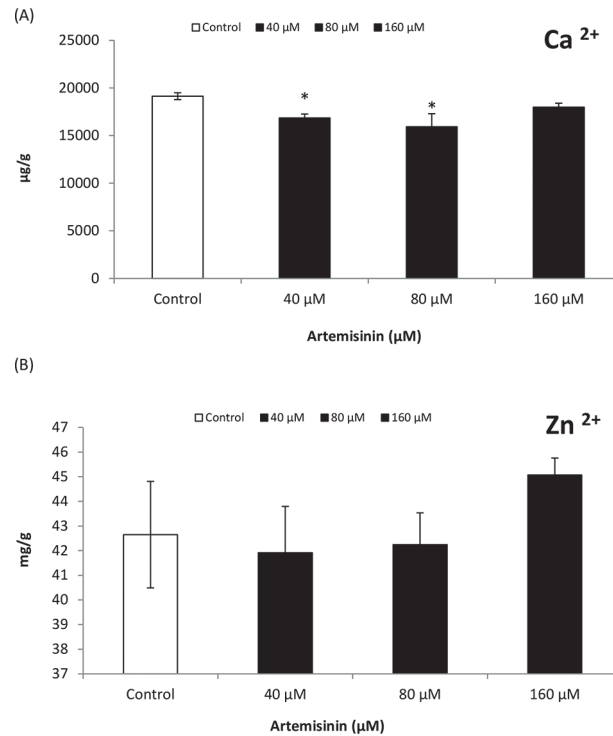

**Figure 7. Zinc and calcium contents (dry weight basis) of leaves of *A. thaliana* treated with different concentrations (0, 40, 80, 160 µM) of artemisinin and in untreated control one week after treatment.** \*Asterisks show the statistical significance as compared to control at  $p < 0.005$ . After Kolmogorov–Smirnov testing for non-normality and Levene’s testing for heteroscedasticity, the statistical significance of differences among group means was estimated by analysis of variance followed by Duncan test for homoscedastic data and by Dunnett test for heteroscedastic data. Each value represents the mean ( $\pm$  S.E.) of four replicates.

doi:10.1371/journal.pone.0114826.g007

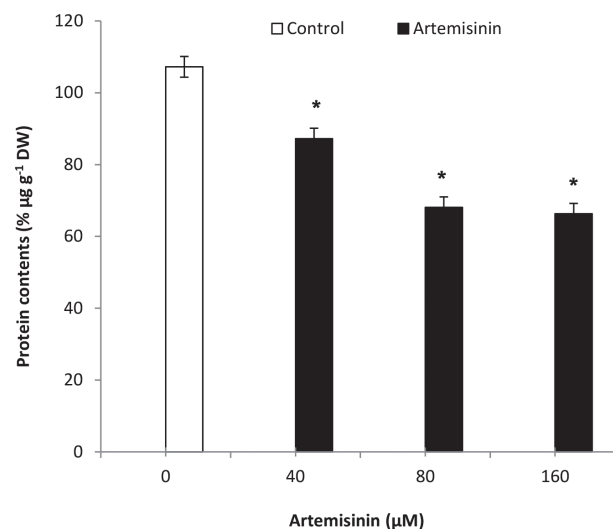

**Figure 8. Changes in leaf protein contents in leaves of *A. thaliana* following exposure to one week of artemisinin at 40, 80 and 160 µM concentrations and untreated 0 (Control).** \*Asterisks show the statistical significance as compared to control at  $p < 0.005$ . After Kolmogorov–Smirnov testing for non-normality and Levene’s testing for heteroscedasticity, the statistical significance of differences among group means was estimated by analysis of variance followed by the Duncan test for homoscedastic data and by the Dunnett test for heteroscedastic data. Each value represents the mean ( $\pm$  S.E.) of four replicates.

doi:10.1371/journal.pone.0114826.g008



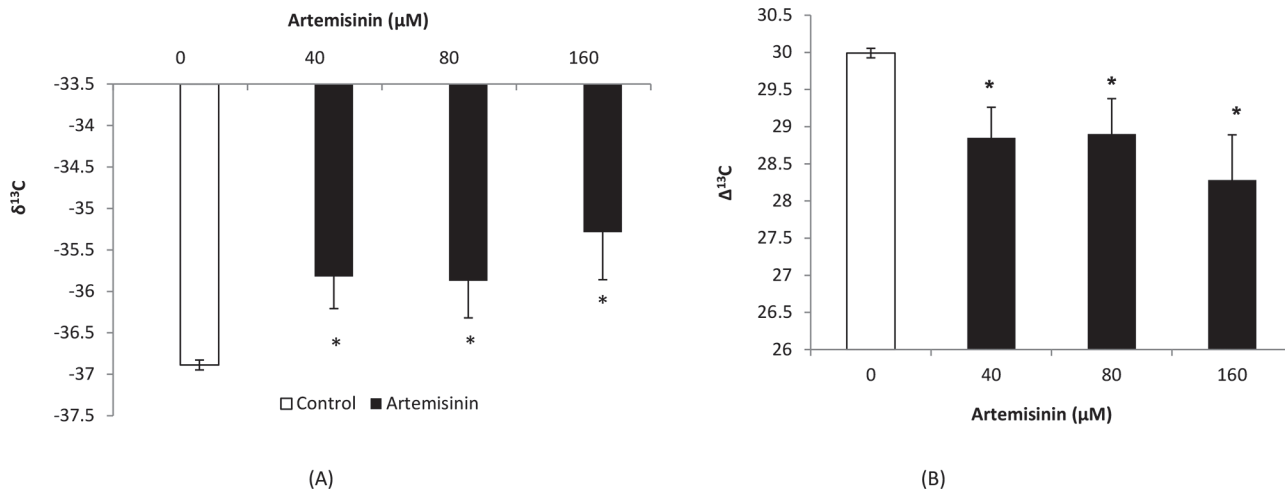

**Figure 9. Changes in carbon isotope composition ( $\delta^{13}\text{C}$ ) and carbon isotope discrimination ( $\Delta^{13}\text{C}$ ) in leaves of *A. thaliana* following exposure to artemisinin at 0, 40, 80, 160  $\mu\text{M}$ .** \*Asterisks show the statistical significance as compared to control at  $p < 0.005$ . After Kolmogorov–Smirnov testing for non-normality and Levene’s testing for heteroscedasticity, the statistical significance of differences among group means was estimated by analysis of variance followed by Duncan test for homoscedastic data and by Dunnett test for heteroscedastic data. Each value represents the mean ( $\pm$  S.E.) of four replicates.

doi:10.1371/journal.pone.0114826.g009

on excitation energy fluxes;  $\Phi_{\text{NPQ}}$ , NPQ and  $\Phi$  (NO), namely photochemical utilization, regulated heat dissipation energy (a loss process serving for protection) and non-regulated heat dissipation energy (a loss process due to PS II inactivity), respectively. The Non-Photochemical Quenching (NPQ) of chlorophyll fluorescence is the most efficient photoprotective response in plants. As soon as the absorbed energy by light LHC exceeds the requirement for photochemical activity, this fast mechanism of heat dissipation is triggered in order to prevent ROS production [46]. The reduction of NPQ in Arabidopsis leaves was detected at all concentrations of artemisinin from day 4 – 7, whereas  $\Phi_{\text{NPQ}}$  were decreased following treatment with 40, 80, 160  $\mu\text{M}$  artemisinin [Fig. 3]. The lower NPQ in Arabidopsis following artemisinin exposure than the control suggested that artemisinin decreased the non-photochemical quenching capacity

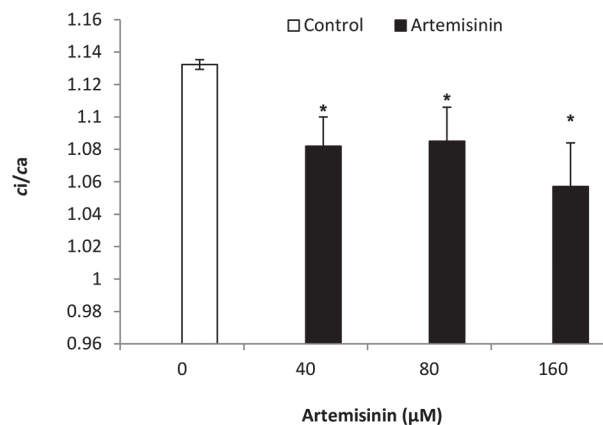

**Figure 10. Ratio of intercellular CO<sub>2</sub> concentrations from leaf to air (ci/ca) in *A. thaliana* following exposure to different concentrations of artemisinin at 0, 40, 80, 160  $\mu\text{M}$ .** \*Asterisks show the statistical significance as compared to control at  $p < 0.005$ . After Kolmogorov–Smirnov testing for non-normality and Levene’s testing for heteroscedasticity, the statistical significance of differences among group means was estimated by analysis of variance followed by Duncan test for homoscedastic data, and by the Dunnett test for heteroscedastic data. Each value represents the mean ( $\pm$  S.E.) of four replicates.

doi:10.1371/journal.pone.0114826.g010

termed as dissipating excess excitation energy absorbed by PSII as heat. Localization of NPQ in the antenna system is an efficient means of protective reactions from overstimulation that could result in the formation of reactive oxygen species (ROS) [47]. The increase in  $\Phi_{NO}$  had already commenced after day 1 and could indicate not only that the plant is under adverse stress conditions, but also that treated plants cannot cope with the stress and dissipate the excess energy into heat through a controlled process. Therefore, lower NPQ and  $\Phi_{NPQ}$  associated with a lower Chl *a*/Chl *b* contents in Arabidopsis plants probably indicates that artemisinin could function in damaging photosynthesis apparatus through destroying photoprotective thermal energy dissipation mechanism and enhancing ROS generation in stress plants. NPQ is a composite of three different components, each one characterized by a peculiar kinetic behaviour. Artemisinin lowered  $q_N$ ,  $\Phi_{II}$  and apparent ETR values as compared to control. The  $\Phi_{NPQ}$ ,  $q_N$ ,  $q_P$  and  $q_L$  were decreased following treatment with artemisinin (Fig. 4).

Malondialdehyde (MDA) is associated with the peroxidation of polyunsaturated fatty acids in the membrane and, consequently, with cellular integrity [48]. Damage to cell membrane indicated by higher concentrations of MDA content that was observed in artemisinin induced stressed Arabidopsis plants when compared with untreated control. Lipid peroxidation indicates oxidative tissue damage by hydrogen peroxide, superoxide, and hydroxyl radicals resulting in structural alteration of membranes with the release of cell and organelle content, loss of essential fatty acids, and formation of cytosolic aldehyde and peroxide products. Artemisinin stress caused an increase in RO of Arabidopsis at all concentrations. ROS species react with lipids and lead to formation of highly active peroxy radical, which in turn start a chain propagation reaction. Root oxidizability helps plant roots to avoid the uptake of toxic materials and provides protection [49] by measuring the oxygen diffusing from the roots into the surrounding environment due to the oxidation of peroxidase; thus, increased RO indicates the enhanced oxidizing ability of peroxidase, as observed in this study. The enhanced RO indicates an increase in respiratory activity, which correlates to enhanced ROS generation. Various researchers also suggest that ROS act as signalling molecules in plants during defence responses, stress responses and programmed cell death [49]. Previously, we found that allelochemicals benzoxazolin-2[3H]-one and cinnamic acid decreased the efficiency of photosystem II photochemistry [ $F_v/F_m$ ] and photochemical fluorescence yield ( $\Phi_{PSII}$ ) in *Lolium perenne*, *Dactylis glomerata* and *Rumex acetosa* leaves [45]. However, there is no previous study conducted to check the effect of artemisinin on crops/weeds PSII photochemistry, chlorophyll fluorescence quenching and photon energy dissipation.

Changes in photochemical efficiency, C assimilation and respiration in response to environmental stresses are common in plants; they reflect metabolic adjustments, which include changes in C allocation and N/C balance [50]. In this study, root-respiration (RO) rate increased while C assimilation rate decreased at higher artemisinin concentrations in treated Arabidopsis plant (Table 2). C consumption through root respiration may cause C starvation when C assimilation is inhibited, and may eventually lead to root death under higher artemisinin stress. Leaf nitrogen contents and uptake are costly in terms of energy supply [51]. Increasing artemisinin concentrations increased the root respiration in Arabidopsis that lead to the reduction in leaf nitrogen and carbon contents. The reduction in N is the first sign of senescence due to inhibition in RuBisCO [ribulose-1,5-bisphosphate carboxylase oxygenase] synthesis that contributes to 15–37% in leaf N content [52]. The  $Ca^{2+}$  and  $Mg^{2+}$  content in Arabidopsis leaves fell progressively following artemisinin treatment as compared to control (Fig. 7). Knowing the nutrient status of the plant could provide valuable information for the interpretation of the phytotoxic effects, especially if there are changes in elements that could influence photosynthetic activity ( $Fe^{2+}$ ,  $Cu^{2+}$ , etc.) or when the changes affect hormones

transport and action (e.g.,  $\text{Ca}^{2+}$  or  $\text{Zn}^{2+}$ ). It was found that calcium deficiency can reduce root growth and induce early senescence in the plants [53].

Artemisinin decreased leaf protein contents in *A. thaliana* at all concentrations tested (Fig. 8). Early reduction in protein content becomes especially interesting because one of the first effects observed in senescent leaves is the reduction in protein content and, in particular, of thylakoid membrane proteins responsible for the stability of the antenna complex [54]. The highest reduction was obtained following exposure of *Arabidopsis* to 160  $\mu\text{M}$  artemisinin than control. The change in leaf protein contents in *Arabidopsis* suggests that protein synthesis or proteolysis is affected by artemisinin treatment. Several reports of alteration of protein synthesis or degradation of protein in *Arabidopsis* and in other plant species in response to different allelochemicals support our results [45, 55].

Stable carbon isotope composition analysis of leaves is a potential source of information about carbon use properties that could be compared among many plants, weeds, trees, grasses, and within remote forests. The potential changes of isotopic signatures in plant dry matter are of relevance for the use of  $^{13}\text{C}$  in plant ecophysiological studies. The  $\delta^{13}\text{C}$  data are used to study plant water use efficiency, respiration and secondary fractionation processes [56]. There are only few reports in the literature on the carbon isotope composition of  $\text{CO}_2$  respired by plants after allelochemical stress treatment [57]. In our study, the  $\delta^{13}\text{C}$  values were less negative following treatment with 40, 80 and 160  $\mu\text{M}$  artemisinin as compared to control [Fig. 9]. At 40, 80  $\mu\text{M}$  artemisinin decreased the  $\Delta^{13}\text{C}$  in *A. thaliana* leaves as compared to control. Carbon isotope discrimination was reduced following treatment with BOA and cinnamic acid [CA] at 1.5 mM in *Lolium perenne*; *Dactylis glomerata* and *Rumex acetosa* [58]. Barkosky et al. [59], concluded that dried leaf tissue from Leafy spurge (*Euphorbia sula*) treated with 0.25 mM caffeic acid had a less negative  $\delta^{13}\text{C}$  compared to controls, indicating less discrimination against  $\Delta^{13}\text{C}$  in these plants. Artemisinin (40, 80 and 160  $\mu\text{M}$ ) also decreased the ratio of intercellular  $\text{CO}_2$  from inside to outside environment [ci/ca] when compared with the control in *A. thaliana* (Fig. 10). Other researchers have reported that BOA also affect the ratio of intercellular to air  $\text{CO}_2$  concentrations [ci/ca] in *Lactuca sativa* that was less [0.66] as compared to control [0.69] when treated with 1.0 mM BOA [60]. Similarly, Hussain et al. [58] found that, BOA at 1.5 mM decreased the ratio of  $\text{CO}_2$  concentrations from intercellular to ambient in *L. perenne*, *D. glomerata* and *R. acetosa* relative to control.

## Conclusions

In summary, alterations in Chl *a* and *b* was affected in *Arabidopsis* plants following exposure to artemisinin that indicate not only acclimatory adjustment of pigment composition and photoprotection in leaves, but also escape from oxidative stress. These results demonstrate the occurrence of allelopathy as a mechanism of interference under controlled conditions, but these responses may differ in complex and under the natural field settings. The low fresh biomass, decreased efficiency of photosystem II photochemistry, reduced  $\Delta^{13}\text{C}$ , less leaf mineral nutrients, and higher lipid peroxidation attributes to the poor tolerance of *Arabidopsis* against the artemisinin. The artemisinin produced by *A. annua* may be released into the soil either via dead plant material, leaching through rainfall, or the incorporation of plant parts left on the soil after harvest. The artemisinin released into the surrounding environment can cause alteration in growth, biochemical and ecophysiological attributes of neighbouring plants and weeds.

## Supporting Information

**S1 File.**  
(ZIP)

## Acknowledgments

We thank Adela Sanchez, Carlos Bolaño, Ana Martínez Peñalver and Nuria Pedrol with field and laboratory assistance. We are also grateful to Jesús Estévez Sío and Jorge Millos for their technical assistance with isotope ratio mass spectroscopy work. We are highly grateful to Ian-Charles Coleman (U.K.) for help in English grammar correction. We are extremely thankful to the editor and anonymous reviewers for the critical and valuable comments that have greatly improved the article.

## Author Contributions

Conceived and designed the experiments: MIH MJR. Performed the experiments: MIH. Analyzed the data: MIH MJR. Contributed reagents/materials/analysis tools: MIH MJR. Wrote the paper: MIH MJR.

## References

1. Narwal SS (2006) Allelopathy in ecological sustainable agriculture, in: Reigosa M.J., Pedrol N., González L. (Eds.), *Allelopathy: A Physiological Processes with Ecological Implications*. Springer, Dordrecht, The Netherlands, pp. 537–564.
2. Inderjit Weston LA, Duke SO (2007) Challenges, achievements and opportunities in allelopathy research. *J Plant Interact* 1: 69–81.
3. Dayan FE, Romagni JG, Duke SO (2000) Investigating the mode of action of natural phytotoxins. *J Chem Ecol* 26: 2079–2094.
4. Dayan FE, Cantrell CL, Duke SO (2009) Natural products in crop protection. *Bioorg Med Chem* 17: 4022–4034. doi: [10.1016/j.bmc.2009.01.046](https://doi.org/10.1016/j.bmc.2009.01.046) PMID: [19216080](https://pubmed.ncbi.nlm.nih.gov/19216080/)
5. Duke MV, Paul RN, Elsohly HN, Surtz G, Duke SO (1994) Localization of artemisinin and artemisete in foliar tissues of glanded and glandless biotypes of *Artemisia annua* L. *Internat J Plant Sci* 155: 365–372.
6. Olsson ME, Olofsson LM, Lindahl A-L, Lundgren A, Brodelius M, et al. (2009) Localization of enzymes of artemisinin biosynthesis to the apical cells of glandular secretory trichomes of *Artemisia annua* L. *Phytochemistry* 70: 1123–1128. doi: [10.1016/j.phytochem.2009.07.009](https://doi.org/10.1016/j.phytochem.2009.07.009) PMID: [19664791](https://pubmed.ncbi.nlm.nih.gov/19664791/)
7. Weathers PJ, Elkholy S, Wobbe KK (2006) Artemisinin: the biosynthetic pathway and its regulation in *Artemisia annua*, a terpenoids-rich species. *In Vitro Cellular and Developmental Biology-Plant* 42: 309–317.
8. Stiles LH, Leather GR, Chen PK (1994) Effects of two sesquiterpene lactones isolated from *Artemisia annua* on physiology of *Lemna minor*. *J Chem Ecol* 20: 969–978. doi: [10.1007/BF02059591](https://doi.org/10.1007/BF02059591) PMID: [24242209](https://pubmed.ncbi.nlm.nih.gov/24242209/)
9. Chen PK, Leather GR (1990) Plant growth regulatory activities of artemisinin and its related compounds. *J Chem Ecol* 16: 1867–1876. doi: [10.1007/BF01020500](https://doi.org/10.1007/BF01020500) PMID: [24263990](https://pubmed.ncbi.nlm.nih.gov/24263990/)
10. Duke SO, Vaughn KC, Croom EM, Elsohly HN (1987) Artemisinin, a constituent of annual wormwood (*Artemisia annua*), is a selective phytotoxin. *Weed Sci* 35: 499–505.
11. Bagchi GD, Jain DC, Kumar S (1997) Arteether: a potent plant growth inhibitor from *Artemisia annua*. *Phytochemistry* 45: 1131–1133.
12. Bagchi GD, Jain DC (1998) The phytotoxic effects of the artemisinin related compounds of *Artemisia annua*. *J Med Aromat Plant Sci* 20: 5–11.
13. Dayan FE, Hernandez A, Allen SN, Moraes RM, Vroman JA, et al. (1999) Comparative phytotoxicity of artemisinin and several sesquiterpene analogues. *Phytochemistry* 50: 607–614.
14. Lydon J, Teasdale JR, Chen PK (1997) Allelopathic activity of annual wormwood (*Artemisia annua*) and the role of artemisinin. *Weed Sci* 45: 807–811.
15. Duke SO, Vaughn KC, Croom EM, Elsohly HN (1987) Artemisinin, a constituent of annual wormwood (*Artemisia annua*), is a selective phytotoxin. *Weed Sci* 35: 499–505.
16. Jessing KK, Duke SO, Cedergreen N (2014) Potential ecological roles of artemisinin produced by *Artemisia annua* L. *J Chem Ecol* 40: 100–117. doi: [10.1007/s10886-014-0384-6](https://doi.org/10.1007/s10886-014-0384-6) PMID: [24500733](https://pubmed.ncbi.nlm.nih.gov/24500733/)
17. Dayan FE, Owens DK, Duke SO (2012) Rationale for a natural products approach to herbicide discovery. *Pest Manag Sci* 68: 519–528. doi: [10.1002/ps.2332](https://doi.org/10.1002/ps.2332) PMID: [22232033](https://pubmed.ncbi.nlm.nih.gov/22232033/)

18. Dayan FE, Hernandez A, Allen SN, Moraes RM, Vroman JA, et al. (1998) Comparative phytotoxicity of artemisinin and several sesquiterpene analogs. *Phytochemistry* 50: 607–614.
19. Weston LA (1996) Utilization of allelopathy for weed management in agroecosystems. *Agron J* 88: 860–866.
20. Delabays N, Simonnet X, Gaudin M (2001) The genetics of artemisinin content in *Artemisia annua* L. and the breeding of high yielding. *Curr Med Chem* 8: 1795–801. PMID: [11772351](#)
21. Davies MJ, Atkinson CJ, Burns C, Woolley JG, Hipps NA, et al. (2009) Enhancement of artemisinin concentrations and yield in response to optimization of nitrogen and potassium supply to *Artemisia annua*. *Ann Bot* 104: 315–323. doi: [10.1093/aob/mcp126](#) PMID: [19483202](#)
22. Yang R-Y, Zeng X-M, Lu Y-Y, Lu W-J, Feng L-L, et al. (2009) Senescent leaves of *Artemisia annua* are one of the most active organs for overexpression of artemisinin biosynthesis responsible genes upon burst of singlet oxygen. *Plant Medic* 76: 734–742.
23. Macías FA, Molinillo JMG, Varela RM, Galindo JCG (2007) Allelopathy—a natural alternative for weed control. *Pest Manag Sci* 63:327–348. PMID: [17348068](#)
24. Macías FA, Galindo JCG, Castellano D, Velasco RF (2000) Sesquiterpene lactones with potential use as natural herbicide models (II): guaianolides. *J Agric Food Chem* 48: 5288–5296. PMID: [11087474](#)
25. Kramer DM, Johnson G, Kiirats O, Edwards GE (2004) New fluorescence parameters for the determination of QA redox states and excitation energy fluxes. *Photosyn Res* 79: 209–218. PMID: [16228395](#)
26. Klughammer C, Schreiber U (2008) Complementary PS II quantum yields calculated from simple fluorescence parameters measured by PAM fluorometry and the saturation pulse method. *PAM Application Notes* 1: 27–35. PMID: [18430404](#)
27. Wellburn RA (1994) The spectral determination of chlorophyll a and b, as well as total carotenoids using various solvents with spectrophotometers of different resolution. *J Plant Physiol* 144: 307–313.
28. Farquhar GD, Ehleringer JR, Hubick KT (1989) Carbon isotope discrimination and photosynthesis. *Ann Rev Plant Physiol Plant Mol Biol* 40: 503–537. doi:10.1146/annurev.pp.40.060189.002443
29. Farquhar GD, Richards RA (1984) Isotopic composition of plant carbon correlates with water-use efficiency of wheat genotypes. *Aust J Plant Physiol* 11: 539–552.
30. McCarroll D, Loader N (2004) Stable isotope in tree rings. *Quat Sci Rev* 23: 771–801. doi:10.1016/j.quascirev.2003.06.017
31. Robertson A, Overpeck L, Rind D, Mosley-Thompson E, Zielinski O, et al. (2011) Hypothesized climate forcing time series for the last 500 years. *J Geophys Res* 106: 14 783–14 803. doi:10.1029/2000JD900469
32. Shen HC, Zhou WJ, Xi HF, Ye QF (1991) A preliminary study of physiological and yield effects of paclobutrazol on *Brassica napus*. *Acta Agric Univ Zhejiang* 17: 423–426.
33. Hodges DM, DeLong JM, Forney CF, Prange RK (1999) Improving the thiobarbituric acid-reactive-substances assay for estimating lipid peroxidation in plant tissues containing anthocyanins and other interfering compounds. *Planta* 207: 604–611.
34. Bradford MM (1976) A rapid and sensitive method for the quantification of microgram quantities of protein utilizing the principle of protein dye binding. *Anal Biochem* 72: 248–254. PMID: [942051](#)
35. Hussain MI, Reigosa MJ (2014) Evaluation of herbicide potential of sesquiterpene lactone and flavonoid: impact on germination, seedling growth indices and root length in *Arabidopsis thaliana*. *Pak J Bot* 46: 995–1000.
36. DiTomaso JM, Duke SO (1991) Is polyamine biosynthesis a possible site of action of cinmethylin and artemisinin? *Pest Biochem Physiol* 39: 158–167.
37. Lommen WJM, Elzinga S, Verstappen FWA, Bouwmeester HJ (2007) Artemisinin and sesquiterpene precursors in dead and green leaves of *Artemisia annua* L. crops. *Plant Medic* 73: 1133–1139. PMID: [17628838](#)
38. Chen PK, Polatnick M (1991) Comparative study on artemisinin, 2,4-D, and glyphosate. *J Agri Food Chem* 39: 991–994.
39. Sánchez-Moreiras AM, De La Peña TC, Reigosa MJ (2008) The natural compound benzoxazolin-2 (3H)-one selectively retards cell cycle in lettuce root meristem. *Phytochemistry* 69: 2172–2179. doi: [10.1016/j.phytochem.2008.05.014](#) PMID: [18597799](#)
40. Cernusak LA, Ubierna N, Winter K, Holtum JAM, Marshall JD, et al. (2013) Environmental and physiological determinants of carbon isotope discrimination in terrestrial plants. *New Phytol* 200: 950–965. doi: [10.1111/nph.12423](#) PMID: [23902460](#)
41. Barbagallo RP, Oxborough K, Pallett KE, Baker NR (2003) Rapid non-invasive screening for perturbations of metabolism and plant growth using chlorophyll fluorescence imaging. *Plant Physiol* 132: 485–93. PMID: [12805581](#)



42. Xu Q, Henry RL, Guikema JA, Paulsen GM (1995) Association of high-temperature injury with increased sensitivity of photosynthesis to abscisic acid in wheat. *Environm Exp Bot* 35: 441–449.
43. Spundova M, Popelkova H, Ilik P, Skotnica J, Novotny R, et al. (2003) Intra-structural and functional changes in the chloroplasts of detached barley leaves senescing under dark and light conditions. *J Plant Physiol* 160: 1051–1058. PMID: [14593806](#)
44. Bharati A, Kar M, Shabat S (2012) Artemisinin inhibit chloroplast electron transport activity: mode of action. *PLoS one* 7: e38942. doi: [10.1371/journal.pone.0038942](#) PMID: [22719995](#)
45. Hussain MI, Reigosa MJ (2011) Allelochemical stress inhibits growth, leaf water relations, PSII photochemistry, non-photochemical fluorescence quenching and heat energy dissipation in three C<sub>3</sub> perennial species. *J Exp Bot* 62: 4533–4545. doi: [10.1093/jxb/err161](#) PMID: [21659663](#)
46. Inderjit Duke SO (2003) Ecophysiological aspects of allelopathy. *Planta* 217: 529–539. PMID: [12811559](#)
47. Eberhard S, Finazzi G, Wollman FA (2008). The dynamics of photosynthesis. *Ann Rev Gen* 42: 463–515.
48. Montillet JL, Chamnongpol S, Rusterucci C, Dat J, Van de Cotte B, et al. (2005) Fatty acid hydroperoxides and H<sub>2</sub>O<sub>2</sub> in the execution of hypersensitive cell death in tobacco leaves. *Plant Physiol* 38: 1516–1526.
49. Abenavoli MR, De Santis C, Sidari M, Sorgonà A, Badiani M, et al. (2001) Influence of coumarin on the net nitrate uptake in durum wheat. *New Phytol* 150: 619–627.
50. Bohnert HJ, Sheveleva E (1998) Plant stress adaptations—making metabolism move. *Curr Opin Plant Biol* 1: 267–274. PMID: [10066591](#)
51. Salsac L, Chaillou S, Morot-Gaudry JF, Leisant C, Jolivet E (1987) Nitrate and ammonium nutrition in plants. *Plant Physiol Biochem* 25: 805–812.
52. Imai K, Suzuki Y, Mae T, Makino A (2008) Changes in the synthesis of RuBisCO in rice leaves in relation to senescence and N influx. *Ann Bot* 101: 135–144. doi: [10.1093/aob/mcm270](#) PMID: [17965028](#)
53. Himelblau E, Amasino M (2001) Nutrients mobilized from leaves of *Arabidopsis thaliana* during leaf senescence. *J Plant Physiol* 158:1317–23.
54. Liu J, Wu YH, Yang JJ, Liu YD, Shen FF (2008) Protein degradation and nitrogen remobilization during leaf senescence. *J Plant Biol* 51: 11–9.
55. Sánchez-Moreiras AM, Martínez-Peñalver A, Reigosa MJ (2011) Early senescence induced by 2–3H-benzoxazolinone (BOA) in *Arabidopsis thaliana*. *J Plant Physiol*. 168: 863–70. doi: [10.1016/j.jplph.2010.11.011](#) PMID: [21237530](#)
56. Bathellier C, Badeck FW, Couzi P, Harscoet S, Mauve C, et al. (2008) Divergence in δ<sup>13</sup>C of dark respired CO<sub>2</sub> and bulk organic matter occurs during the transition between heterotrophy and autotrophy in *Phaseolus vulgaris* plants. *New Phytol* 177: 406–418. doi:10.1111/j.1365–2486.2008.01609.x PMID: [17953651](#)
57. Barkosky RR, Einhellig FA, Butler JL (2000) Caffeic acid-induced changes in plant-water relationships and photosynthesis and photosynthesis in leafy spurge (*Euphorbia esula* L.). *J Chem Ecol* 26: 2095–2109. doi:10.1023/A:1005564315131
58. Hussain MI, Reigosa MJ (2012) Seedling growth, leaf water status and signature of stable carbon isotope in C<sub>3</sub> perennials exposed to natural phytochemicals. *Aust J Bot* 60: 676–684. <http://dx.doi.org/10.1071/BT12072>
59. Barkosky RR, Einhellig FA, Butler J (2000) Caffeic acid- induced changes in plant water relationships and photosynthesis in leafy spurge (*Euphorbia esula*), *J Chem Ecol*. 26: 2095–2109.
60. Hussain MI, González L, Chiapusio G, Reigosa MJ (2011) Benzoxazolin-2(3H)-one (BOA) induced changes in leaf water relations, photosynthesis and carbon isotope discrimination in *Lactuca sativa*. *Plant Physiol Biochem* 49: 825–834. doi: [10.1016/j.plaphy.2011.05.003](#) PMID: [21665486](#)
